# Supplementary material
Source: MDPI journal article supplement (https://www.mdpi.com/2073-4441/13/22/3272)
Supplement: s1 [file s1]

Previous scholars set up 21 groundwater level observation wells and 6 freshwater lens thickness observation points on the island and obtained a series of measured data [36]. We use these data to validate the model:

(1) Verification of groundwater level:

The relative errors between the measured and simulated values of groundwater level are shown in Table 1, ranging from 0.38% to 3.64%

(2) Verification of freshwater lens thickness:

The relative errors between the measured and simulated values of freshwater lens thickness are shown in Table 2, ranging from 0.74% to 8.33%.

It can be judged that the simulation results of the model fit well with the actual ones, which means the numerical model has high fitting accuracy.

**Table S1. Comparison of simulated and measured values of groundwater level**

| Well number | Simulated value/m | Measured value/m | Relative Error/% |
|-------------|-------------------|------------------|------------------|
| 01          | 25.20             | 26.08            | 3.36             |
| 02          | 25.23             | 25.32            | 0.38             |
| 03          | 25.25             | 26.10            | 3.27             |
| 04          | 25.25             | 26.13            | 3.36             |
| 05          | 25.25             | 26.17            | 3.51             |
| 06          | 25.24             | 25.85            | 2.34             |
| 07          | 25.23             | 26.17            | 3.59             |
| 08          | 25.21             | 26.02            | 3.10             |
| 09          | 25.22             | 26.01            | 3.02             |
| 10          | 25.24             | 26.01            | 2.97             |
| 11          | 25.25             | 25.92            | 2.58             |
| 12          | 25.25             | 26.01            | 2.94             |
| 13          | 25.22             | 25.96            | 2.84             |
| 14          | 25.22             | 25.88            | 2.54             |
| 15          | 25.20             | 26.00            | 3.07             |
| 16          | 25.23             | 25.84            | 2.35             |
| 17          | 25.24             | 26.00            | 2.91             |
| 18          | 25.25             | 26.20            | 3.64             |
| 19          | 25.25             | 26.07            | 3.16             |
| 20          | 25.23             | 26.06            | 3.21             |
| 21          | 25.23             | 25.99            | 2.91             |

**Table S2. Comparison of simulated and measured values of freshwater lens thickness**

| Point number | Simulated value/m | Measured value/m | Relative Error/% |
|--------------|-------------------|------------------|------------------|
| TH01         | 3.40              | 3.20             | 6.25             |
| TH02         | 4.00              | 4.30             | 6.98             |
| TH03         | 6.50              | 6.00             | 8.33             |
| TH04         | 7.00              | 6.50             | 7.69             |
| TH05         | 8.80              | 8.40             | 4.76             |
| TH06         | 13.40             | 13.50            | 0.74             |
